# Supplementary material for: TBC1D12 is a novel Rab11-binding protein that modulates neurite outgrowth of PC12 cells
Source: PLOS journal article supplement (doi:10.1371/journal.pone.0174883), 2017-04-06
Supplement: S4 (10.1371/journal.pone.0174883.s004) [file journal.pone.0174883.s004]

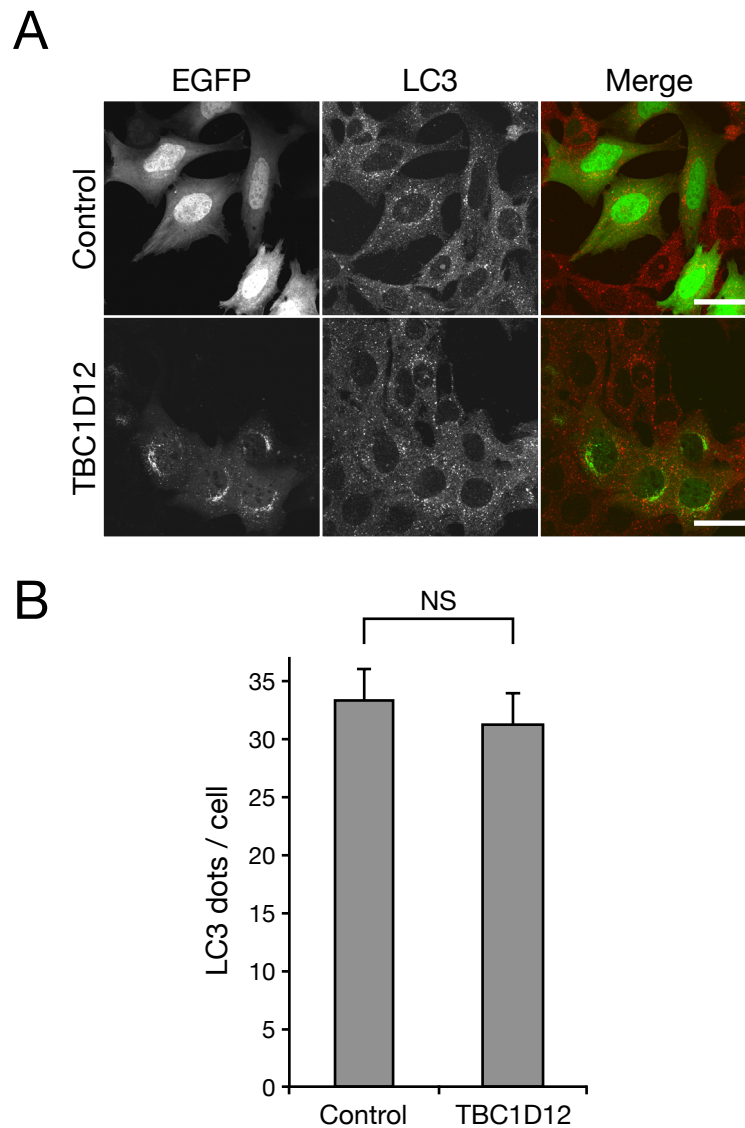

**S4 Fig. Effect of TBC1D12 overexpression on starvation-induced autophagy in MEF cells.** (A) Overexpression of TBC1D12 did not affect LC3 dot numbers under starved conditions. MEFs transiently expressing EGFP alone (control) or EGFP-TBC1D12 were fixed after incubation for 2 h in EBSS. The cells were immunostained with anti-LC3 antibody (1/250 dilution) and examined with a confocal fluorescence microscope. Scale bars, 40  $\mu$ m. (B) The mean numbers of LC3-positive dots per cell in (A) are shown. Error bars indicate the SEMs of data from  $n = 24$  (control) and  $n = 19$  (EGFP-TBC1D12). NS, not significant.
